# Supplementary material for: Fe2P nanoparticle-decorated carbon nanofiber composite towards lightweight and highly efficient microwave absorption
Source: Royal Society of Chemistry journal article supplement (doi:10.1039/d3dt03215a), 2023-01-01
Supplement: d3dt03215a1.pdf [file d3dt03215a1.pdf]

## Supporting Information

### **Fe<sub>2</sub>P nanoparticles-decorated carbon nanofiber composite towards lightweight and highly-efficient microwave absorption**

Yao Li <sup>a</sup>, Guangguang Guan <sup>a</sup>, Liang Yan <sup>a</sup>, Kaiyin Zhang <sup>b</sup> and Jun Xiang <sup>\*a</sup>

<sup>a</sup> *School of Science, Jiangsu University of Science and Technology, Zhenjiang 212100, PR China*

<sup>b</sup> *College of mechanical and electrical engineering, Wuyi University, Wuyishan 354300, PR China*

*\*Corresponding author.*

*E-mail address: jxiang@just.edu.cn (J. Xiang)*

#### **Experimental section**

##### 1. Materials

Polyacrylonitrile (PAN, Mw = 150,000), N,N-Dimethylformamide (DMF), ferric acetylacetonate (Fe(acac)<sub>3</sub>), and phosphonitrilic chloride trimer (Cl<sub>6</sub>N<sub>3</sub>P<sub>3</sub>) were purchased from Shanghai Aladdin Biochemical Technology Co., Ltd. All the materials were used directly without further purification.

##### 2. Characterization

Phase structure of Fe<sub>2</sub>P@CNFs and CNFs were analyzed by X-ray diffractometer (XRD, Shimadzu XRD-6000) with Cu K $\alpha$  radiation ( $\lambda = 0.15406$  nm). Raman spectra were recorded on a Renishaw in Via Reflex Raman spectrometer with a 532 nm laser. The surface morphology and microstructure of the samples were observed through field-emission scanning electron microscopy (FE-SEM, Zeiss Merlin Compact) and transmission electron microscope (TEM, FEI Tecnai F20 G2). Thermogravimetric (TG) analysis was conducted on a Shimadzu DTG-60H thermal analyzer from room temperature to 800 °C with a heating rate of 10 °C/min in air atmosphere.

##### 3. Electromagnetic measurement

To investigate the electromagnetic characteristics and microwave absorption properties, the prepared products were uniformly mixed with paraffin wax at a mass ratio of 1:9 (10 wt%), and then pressed into toroidal-shaped specimens with an outer diameter of 7.00 mm, an inner diameter of 3.04 mm, and a thickness of 2–3 mm. The vector network analyzer (Agilent PAN N5224A) was employed to measure the electromagnetic parameters in the frequency range of 2–18 GHz based on a coaxial transmission/reflection mode. To reveal the effect of the filling ratio on the EM and MA performances,

the composites with 7.5 wt% and 12.5 wt% Fe<sub>2</sub>P@CNFs were also prepared.

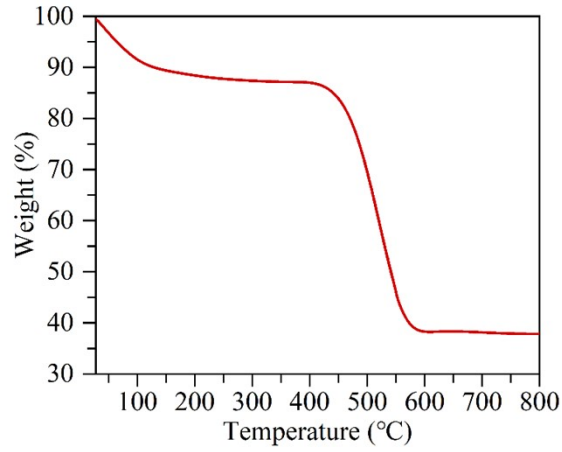

**Fig. S1** TG curve of Fe<sub>2</sub>P@CNFs.

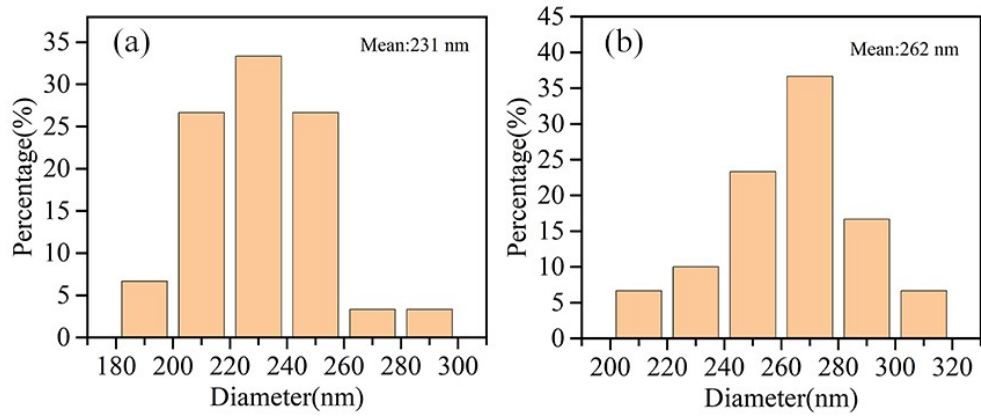

**Fig. S2** Diameter distribution diagrams of (a) CNFs and (b) Fe<sub>2</sub>P@CNFs.

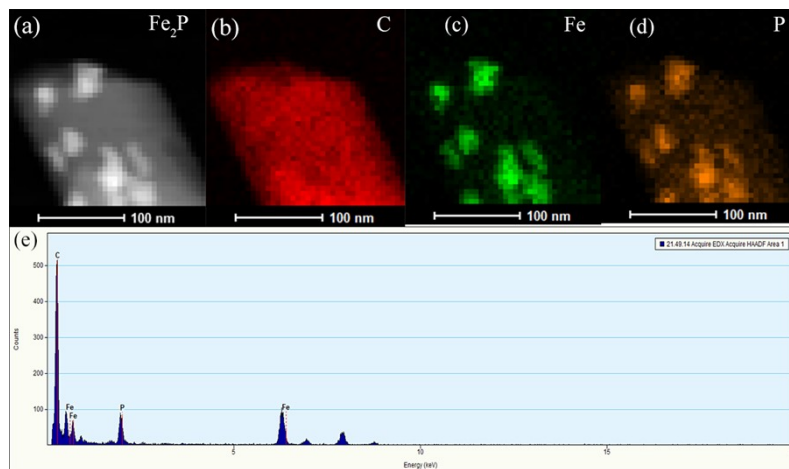

**Fig. S3** HAADF-STEM image and corresponding elemental mappings of Fe<sub>2</sub>P@CNFs

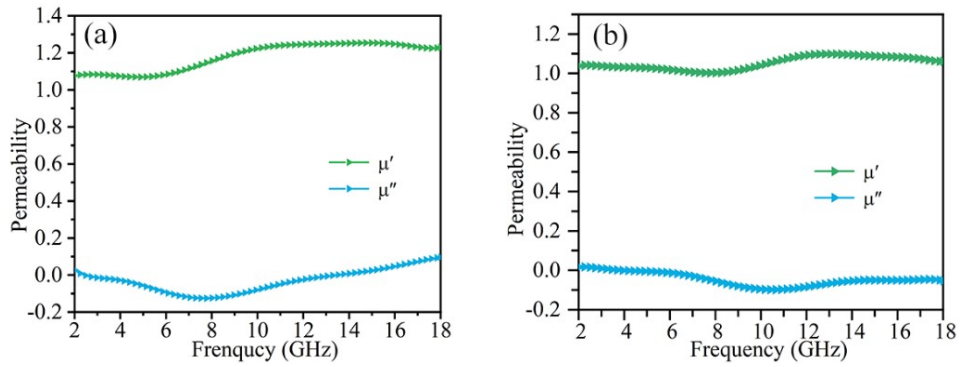

**Fig. S4** Frequency dependence of relative complex permeability for (a) CNFs and (b) Fe<sub>2</sub>P@CNFs.

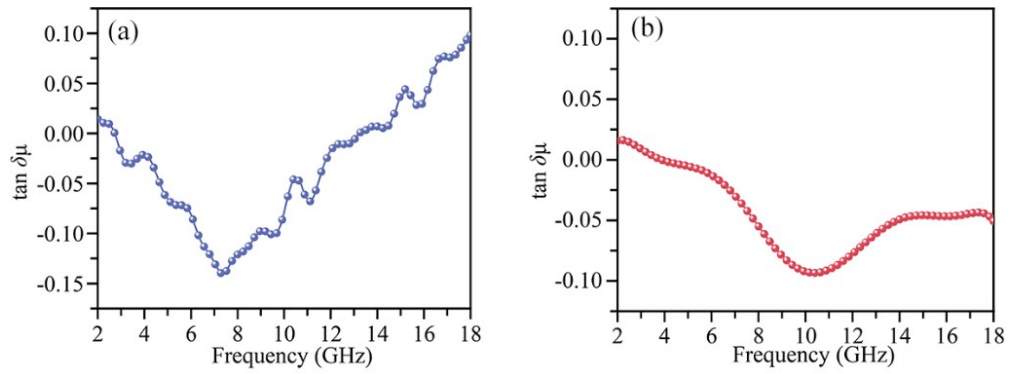

**Fig. S5** Magnetic loss tangents of CNFs and Fe<sub>2</sub>P@CNFs.

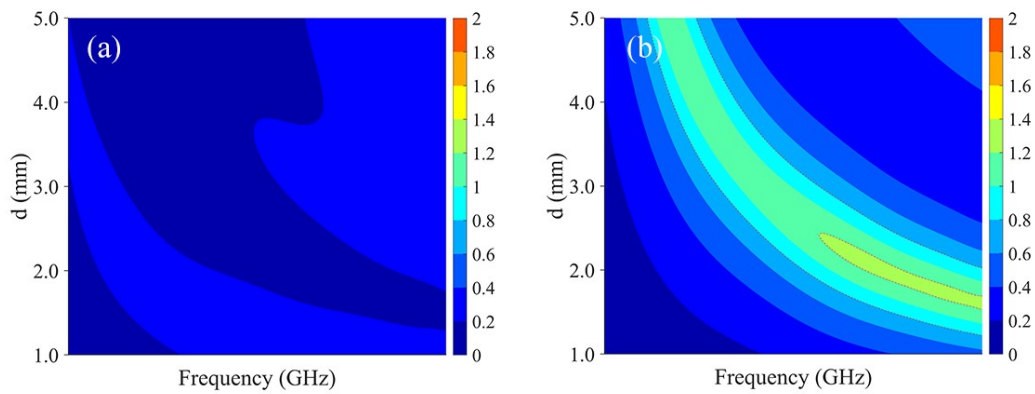

**Fig. S6** 2D contour maps of  $|Z_{in}/Z_0|$  of (a) CNFs and (b) Fe<sub>2</sub>P@CNFs.

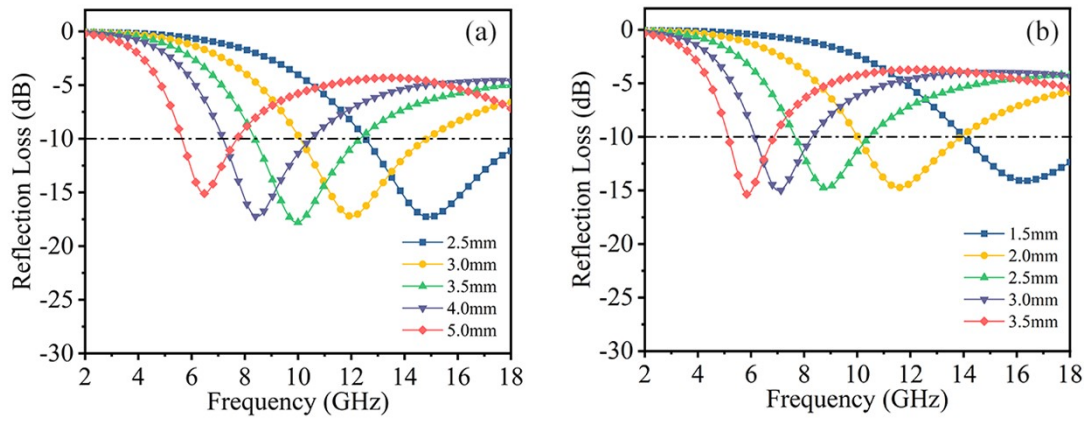

**Fig. S7** RL curves at some specific thicknesses for the  $\text{Fe}_2\text{P}@$ CNFs/paraffin composites with filler loadings of (a) 7.5 wt% and (b) 12.5 wt%.

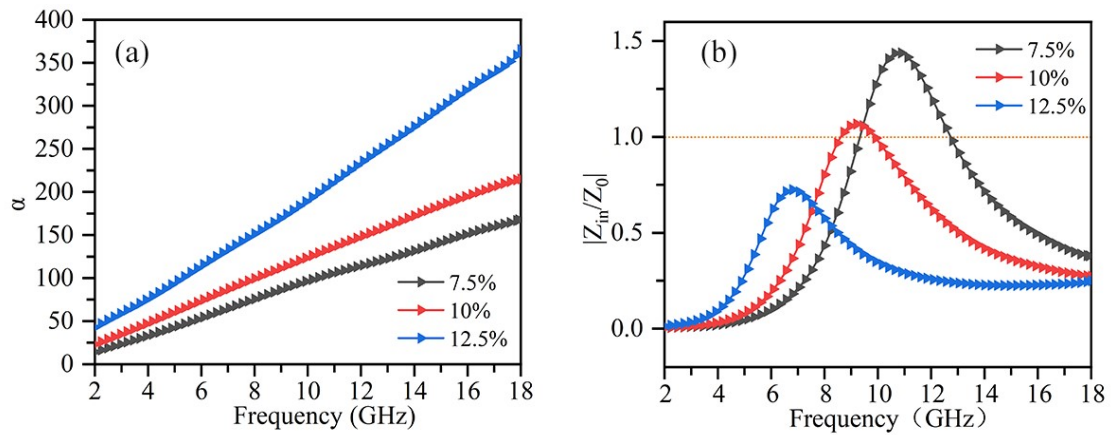

**Fig. S8** Frequency dependence of (a) attenuation constant  $\alpha$  and (b) impedance matching ratio  $|Z_{in}/Z_0|$  of the  $\text{Fe}_2\text{P}@$ CNFs composites with different filler loadings (7.5, 10, and 12.5 wt%).

**Table. S1** Microwave absorption properties of some representative transition metal phosphides and their composites.

| Sample                                             | Loading (wt%) | RL <sub>min</sub> (dB) | EAB (GHz) | Ref.      |
|----------------------------------------------------|---------------|------------------------|-----------|-----------|
| Ni <sub>2</sub> P/rGO                              | 30            | -38.3                  | 3.8       | [30]      |
| NiCoP/rGO                                          | 50            | -20.6                  | 4.1       | [14]      |
| Ni/NiP@NC                                          | 40            | -56.1                  | 4.3       | [31]      |
| Ni <sub>1-x</sub> Co <sub>x</sub> P/MWNTs          | 25            | -26.8                  | 2.2       | [32]      |
| Ni-Co-P                                            | 40            | -41.7                  | 2.2       | [33]      |
| Ni <sub>12</sub> P <sub>5</sub> /Ni <sub>2</sub> P | 35            | -50.06                 | 3.3       | [34]      |
| Co <sub>2</sub> P                                  | 60            | -39.5                  | 2.4       | [13]      |
| FeP                                                | 60            | -37.7                  | 2.8       | [35]      |
| Fe <sub>2</sub> P@CNFs                             | 10            | -49.2                  | 6.0       | This work |

**Table. S2** Microwave absorption properties of some representative iron-based materials.

| Sample                                               | Loading (wt%) | RL <sub>min</sub> (dB) | EAB (GHz) | Ref.      |
|------------------------------------------------------|---------------|------------------------|-----------|-----------|
| $\gamma$ -Fe <sub>2</sub> O <sub>3</sub> @N-RGO      | 30            | -41.1                  | 3.4       | [1]       |
| RGO/ $\gamma$ -Fe <sub>2</sub> O <sub>3</sub> @C     | 20            | -32.4                  | 3.0       | [2]       |
| $\gamma$ -Fe <sub>2</sub> O <sub>3</sub> @porous-RGO | 17            | -34.2                  | 4.5       | [3]       |
| Fe-N@SiO <sub>2</sub>                                | 50            | -23.1                  | 2.4       | [4]       |
| Fe <sub>70</sub> Si <sub>30</sub>                    | 75            | -16.5                  | -         | [5]       |
| Fe/TiO <sub>2</sub> nanowire arrays                  | 80            | -28.36                 | 1.36      | [6]       |
| FeCo@SiO <sub>2</sub> @TiO <sub>2</sub>              | 70            | -33.72                 | 5.8       | [7]       |
| Fe <sub>2</sub> P@CNFs                               | 10            | -49.2                  | 6.0       | This work |

## References

- 1 J. Wang, J. Ren, Q. Li, Y. Liu, Q. Zhang and B. Zhang, *Carbon*, 2021, **184**, 195-206.
- 2 S. Ouyang, H. Fu, Y. Xie, W. He and Y. Ling, *Journal of Alloys and Compounds*, 2022, **920**, 166015.
- 3 S. Wang, Q. Jiao, X. Liu, Y. Xu, Q. Shi, S. Yue, Y. Zhao, H. Liu, C. Feng and D. Shi, *ACS Sustainable Chemistry & Engineering*, 2019, **7**, 7004-7013.
- 4 X. Kou, Y. Zhao, L. Xu, Z. Kang, Y. Wang, Z. Zou, P. Huang, Q. Wang, G. Su, Y. Yang and Y. Sun, *Journal of Colloid and Interface Science*, 2022, **615**, 685-696.
- 5 G. Xie, L. Yuan, P. Wang, B. Zhang, P. Lin and H. Lu, *Journal of Non-Crystalline Solids*, 2010, **356**, 83-86.
- 6 Y. Zhu, X. Li, P. Chen and B. Zhu, *Ceramics International*, 2020, **46**, 23985-23996.
- 7 Y. Li, H. Cheng, N. Wang, S. Zhou, D. Xie, T. Li, *J. Magn. Magn. Mater*, 2019, **471**, 346-354.
